# Supplementary figures and images for: The Frequency and Immunodominance of Islet-Specific CD8+ T-cell Responses Change after Type 1 Diabetes Diagnosis and Treatment
Source: Oxford University Press journal article supplement (doi:10.2337/db07-1594), 2008-02-28

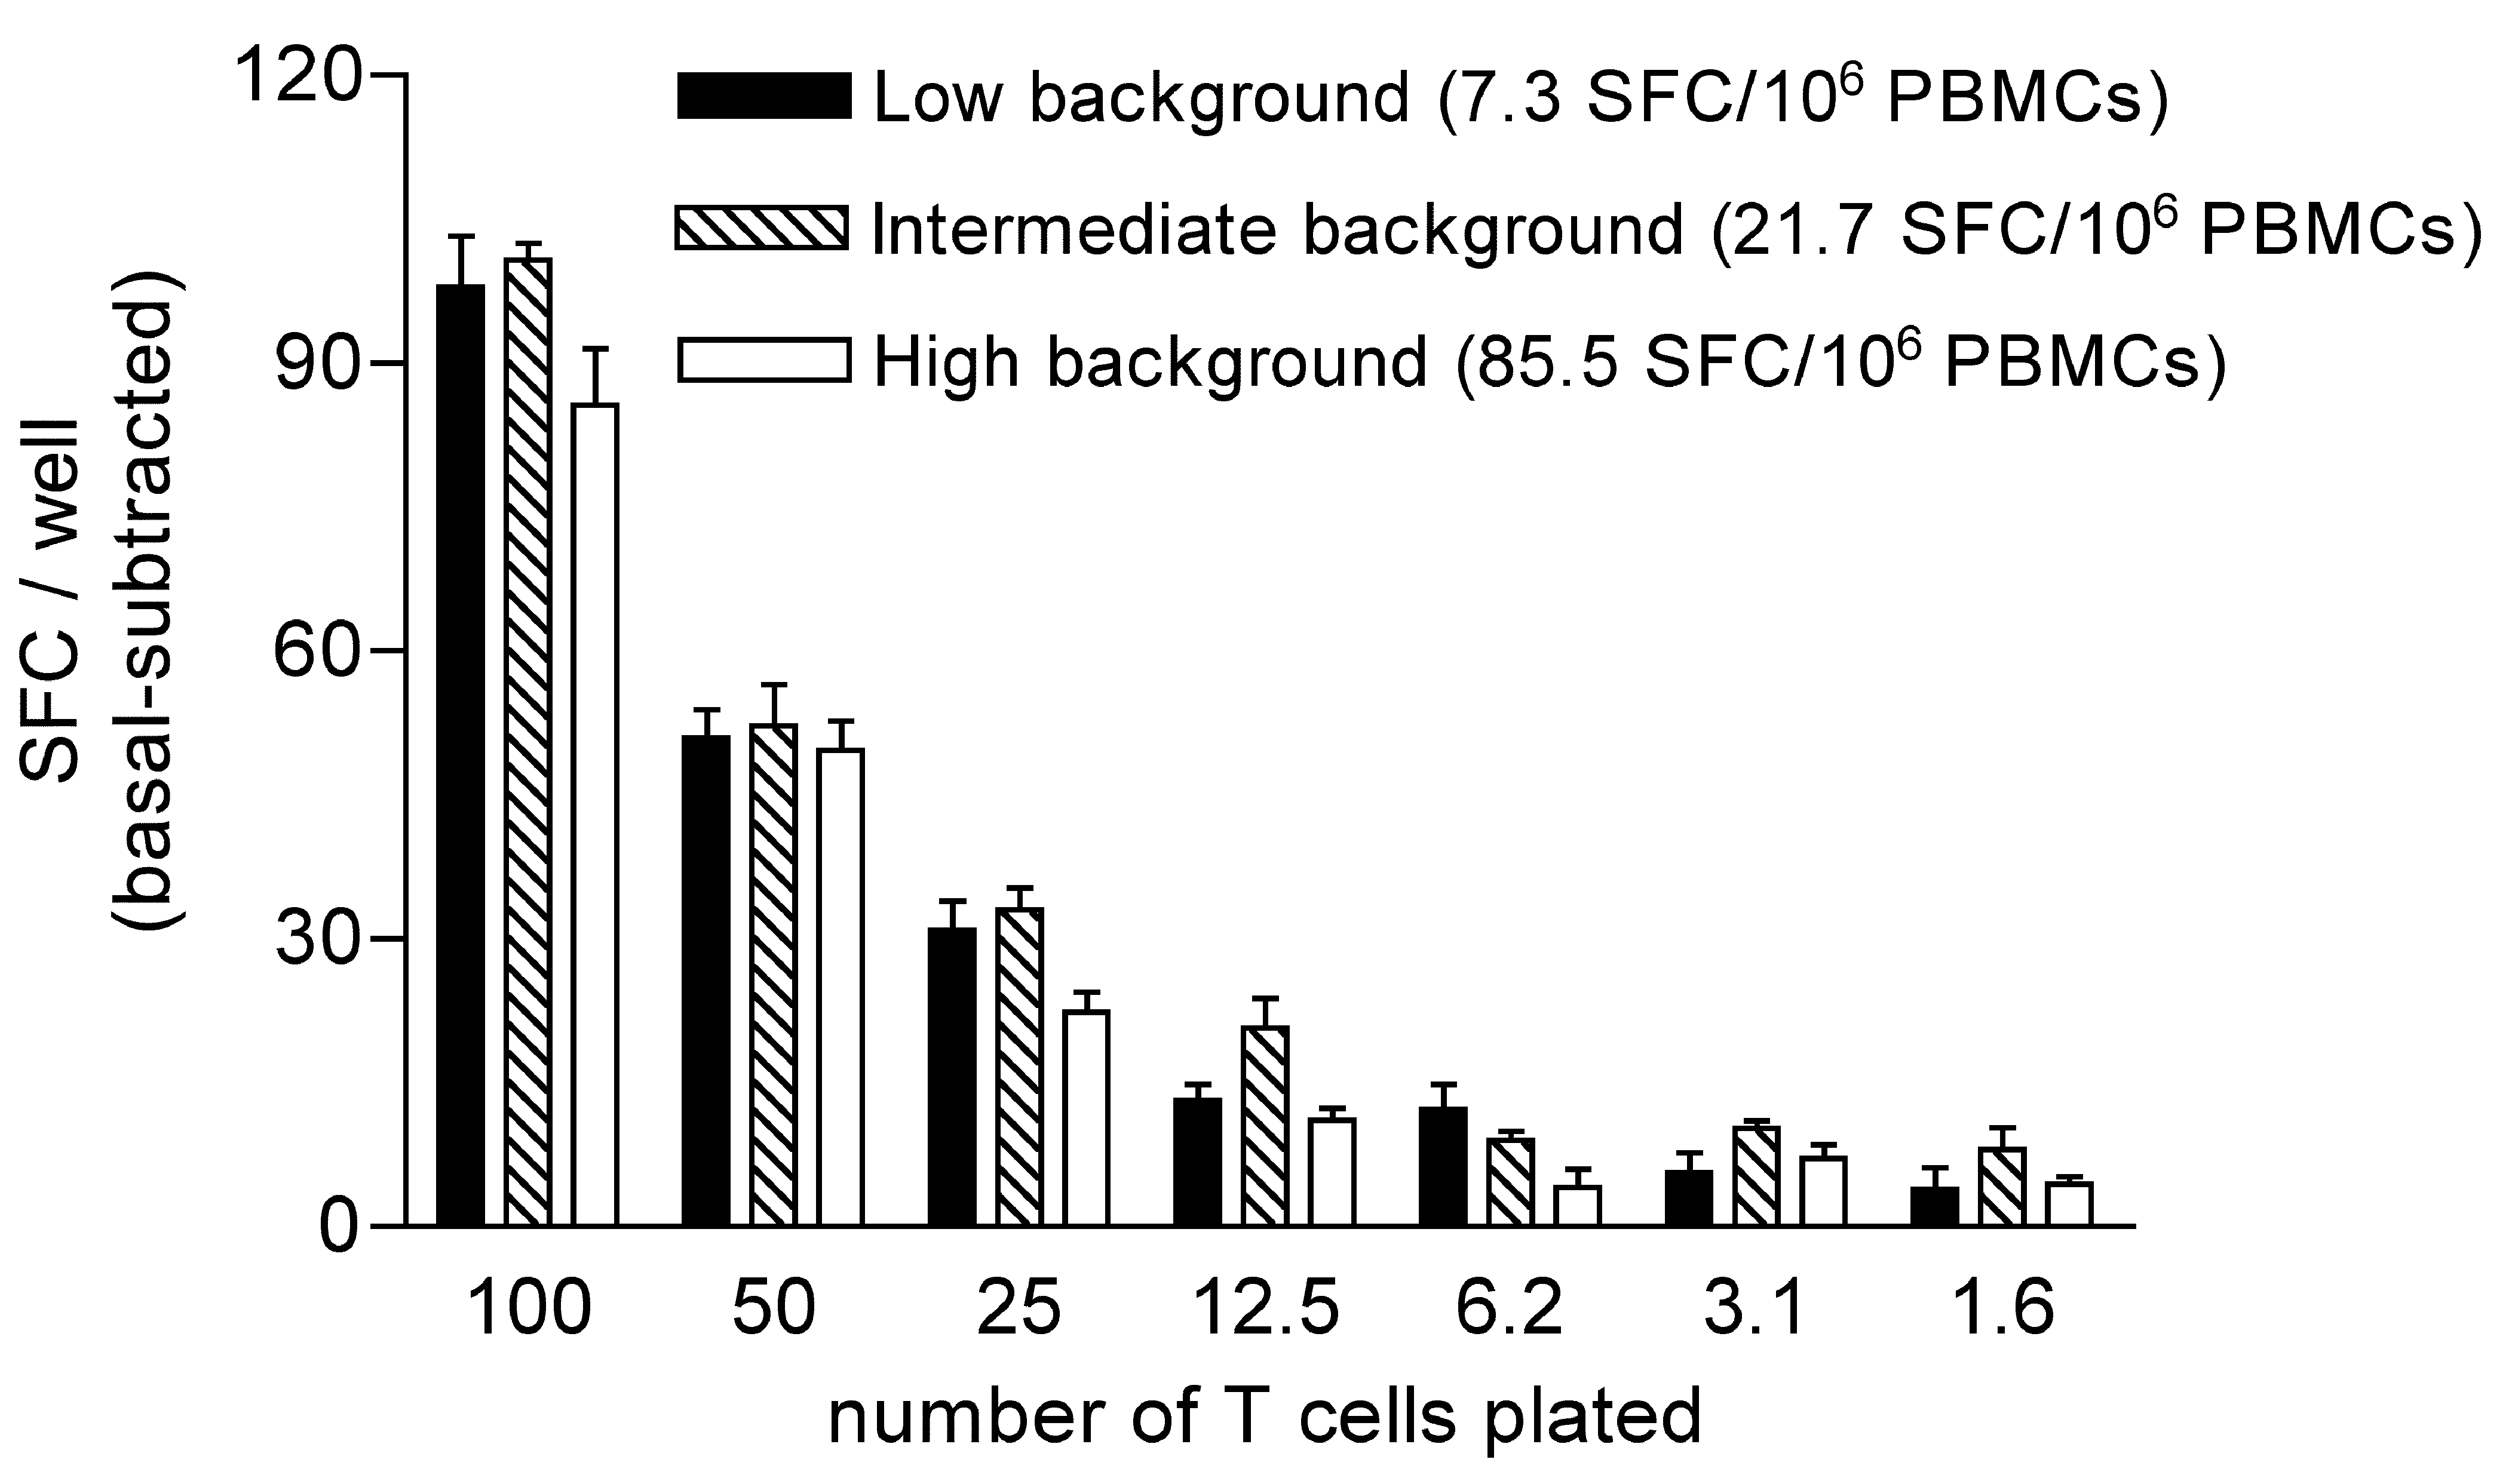
**FIGURE 1**

**
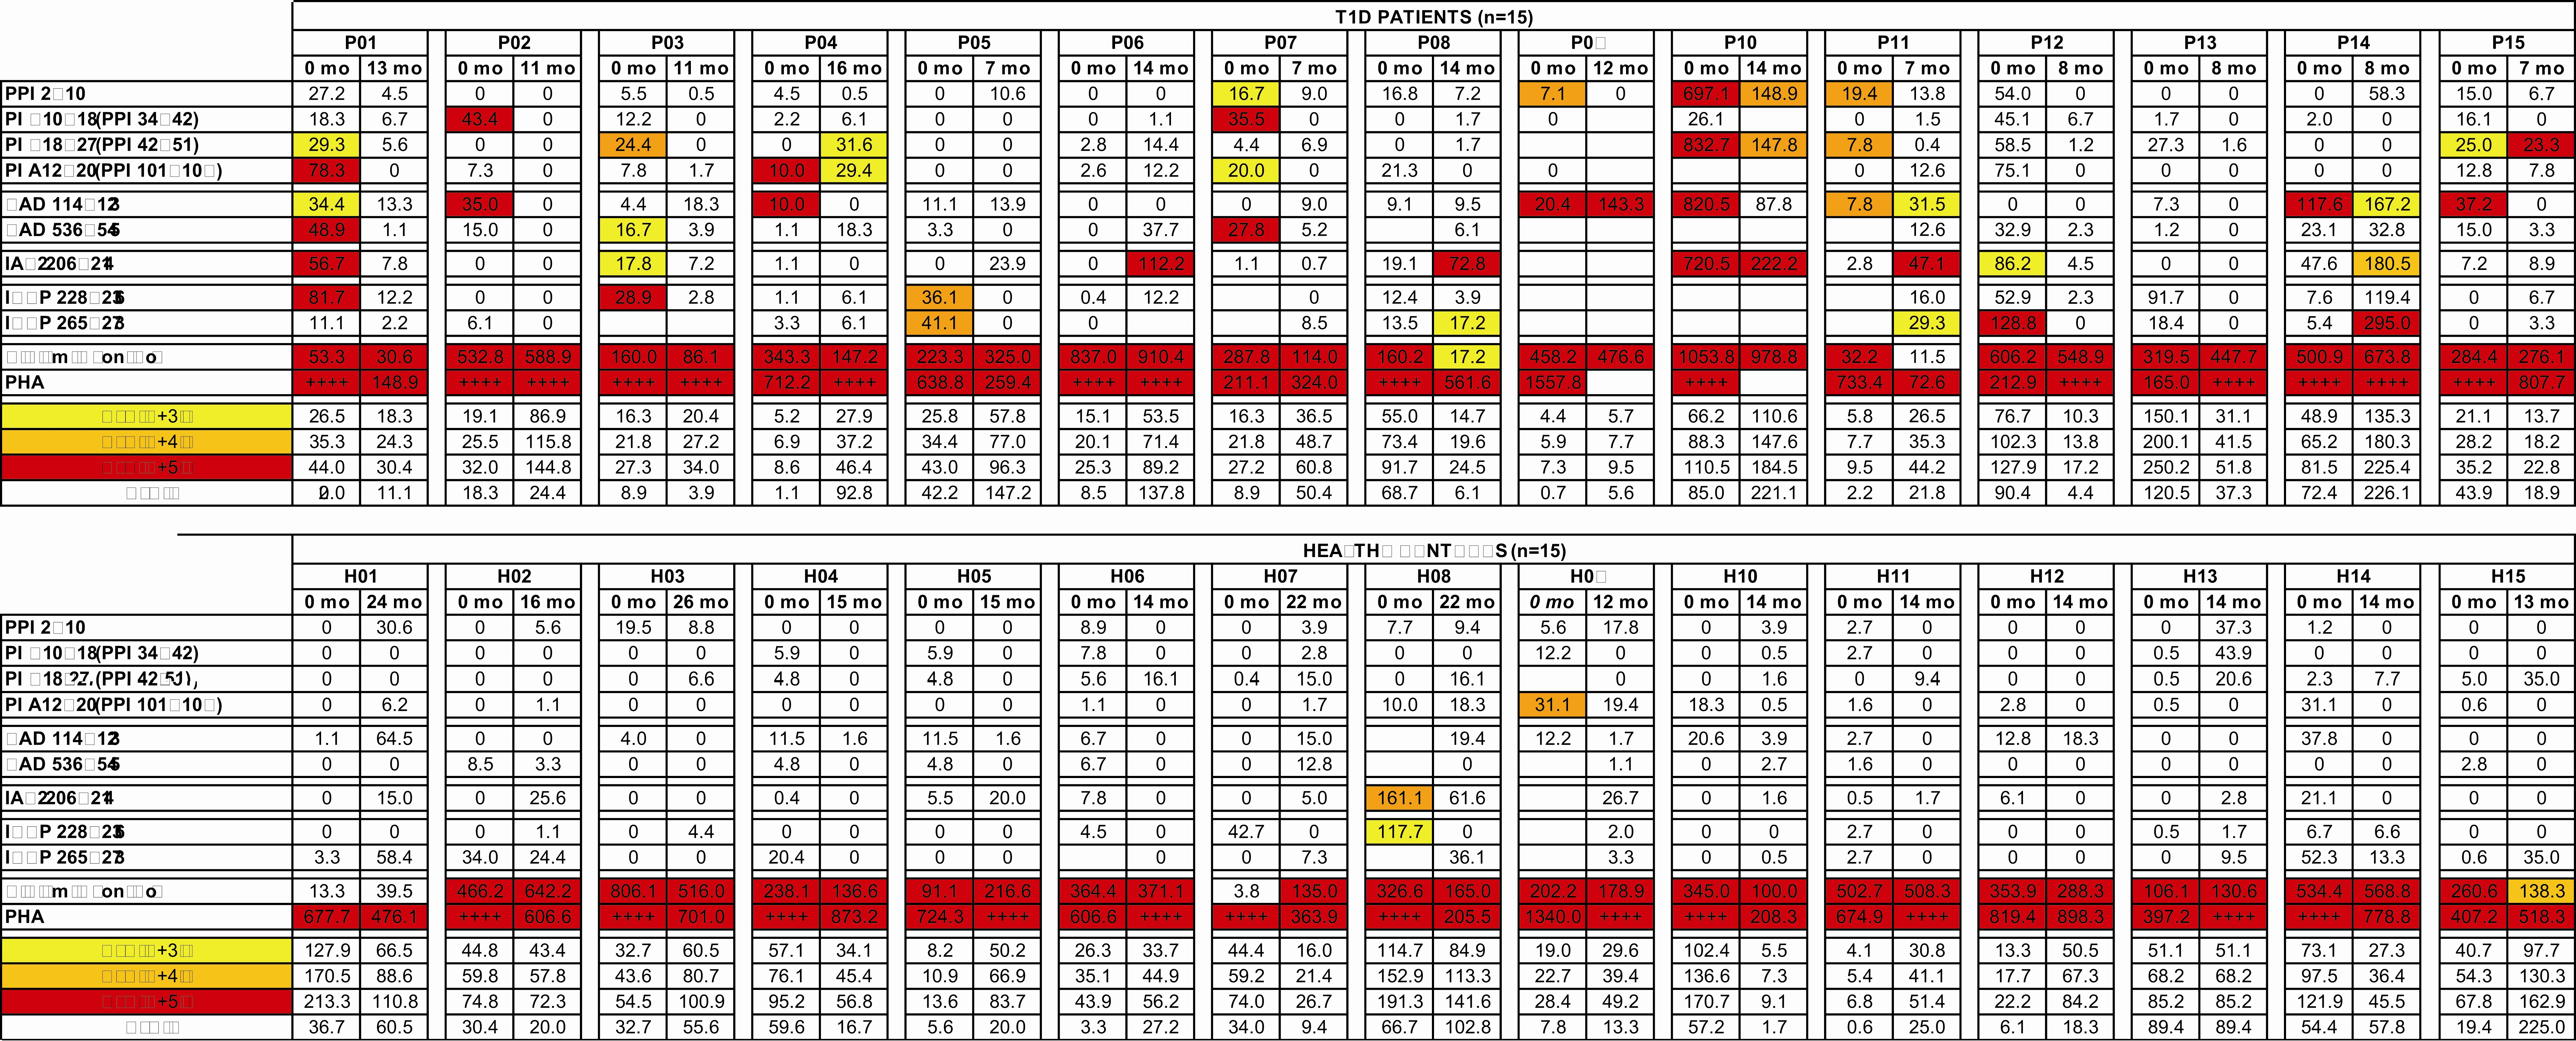
**

**FIGURE 2**

**
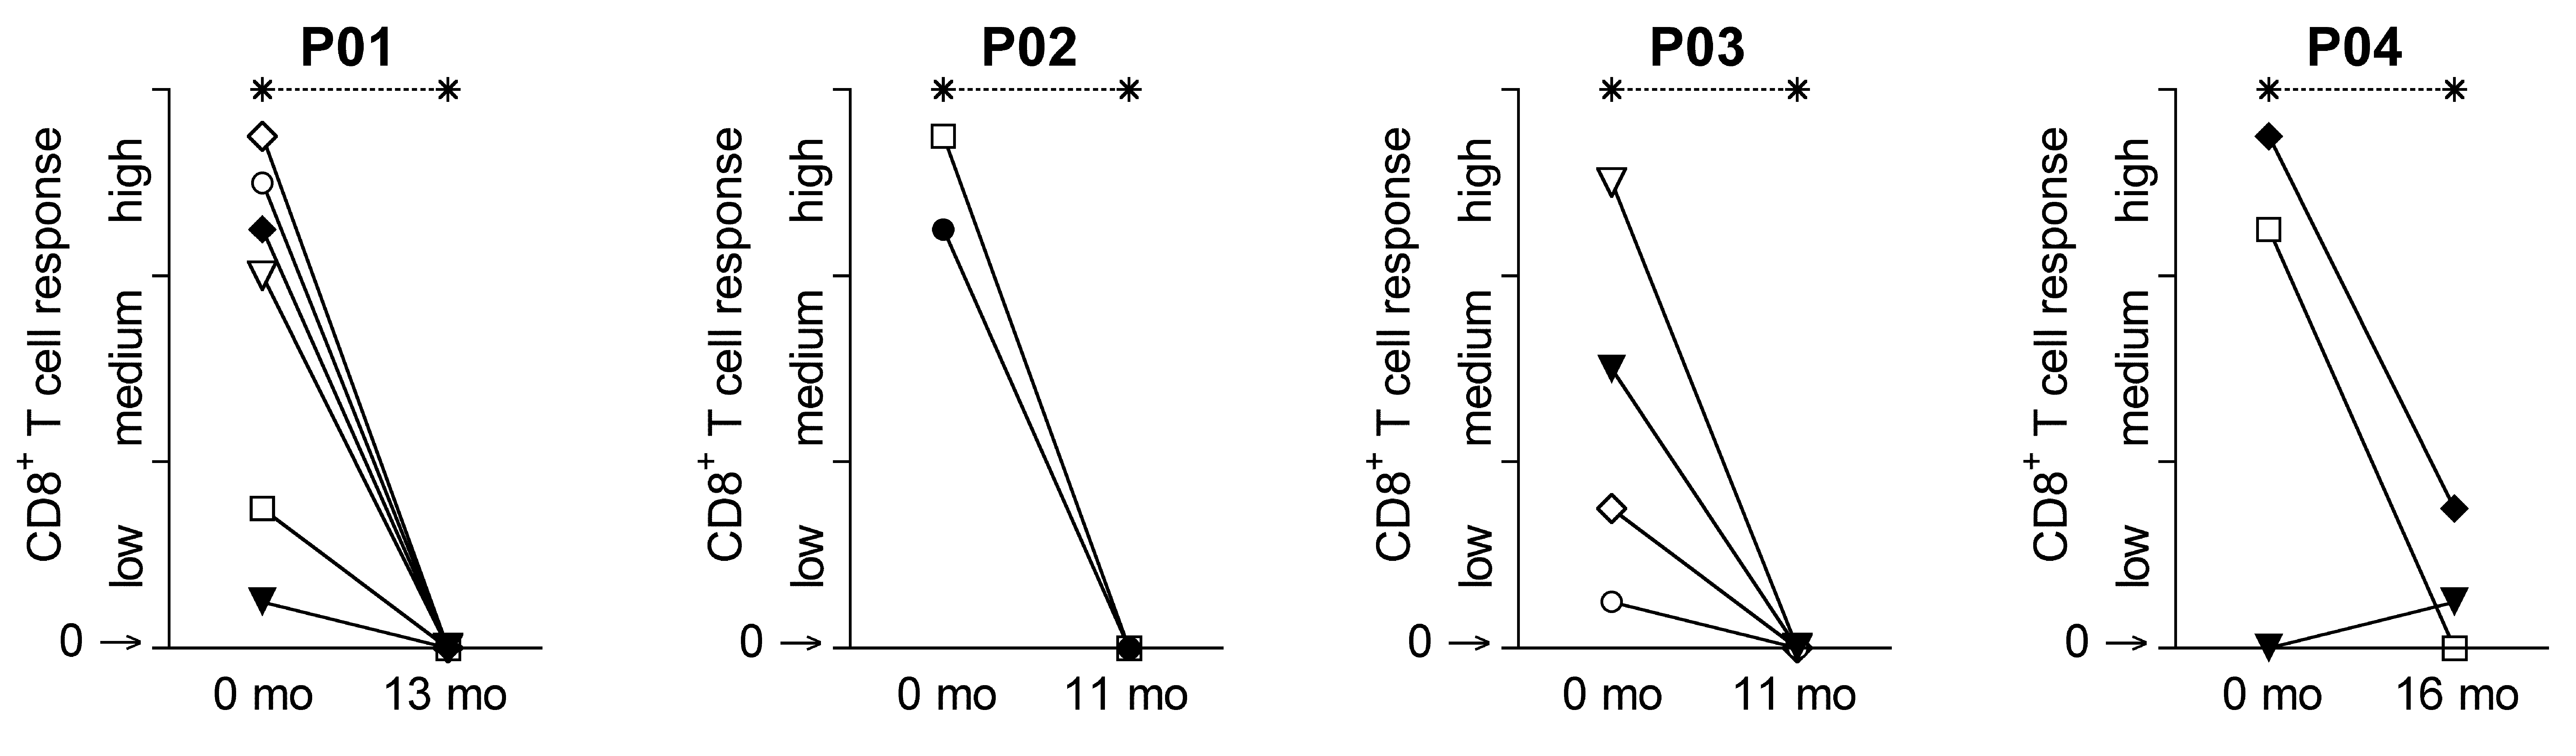
FIGURE 3**

**PART 1**

**
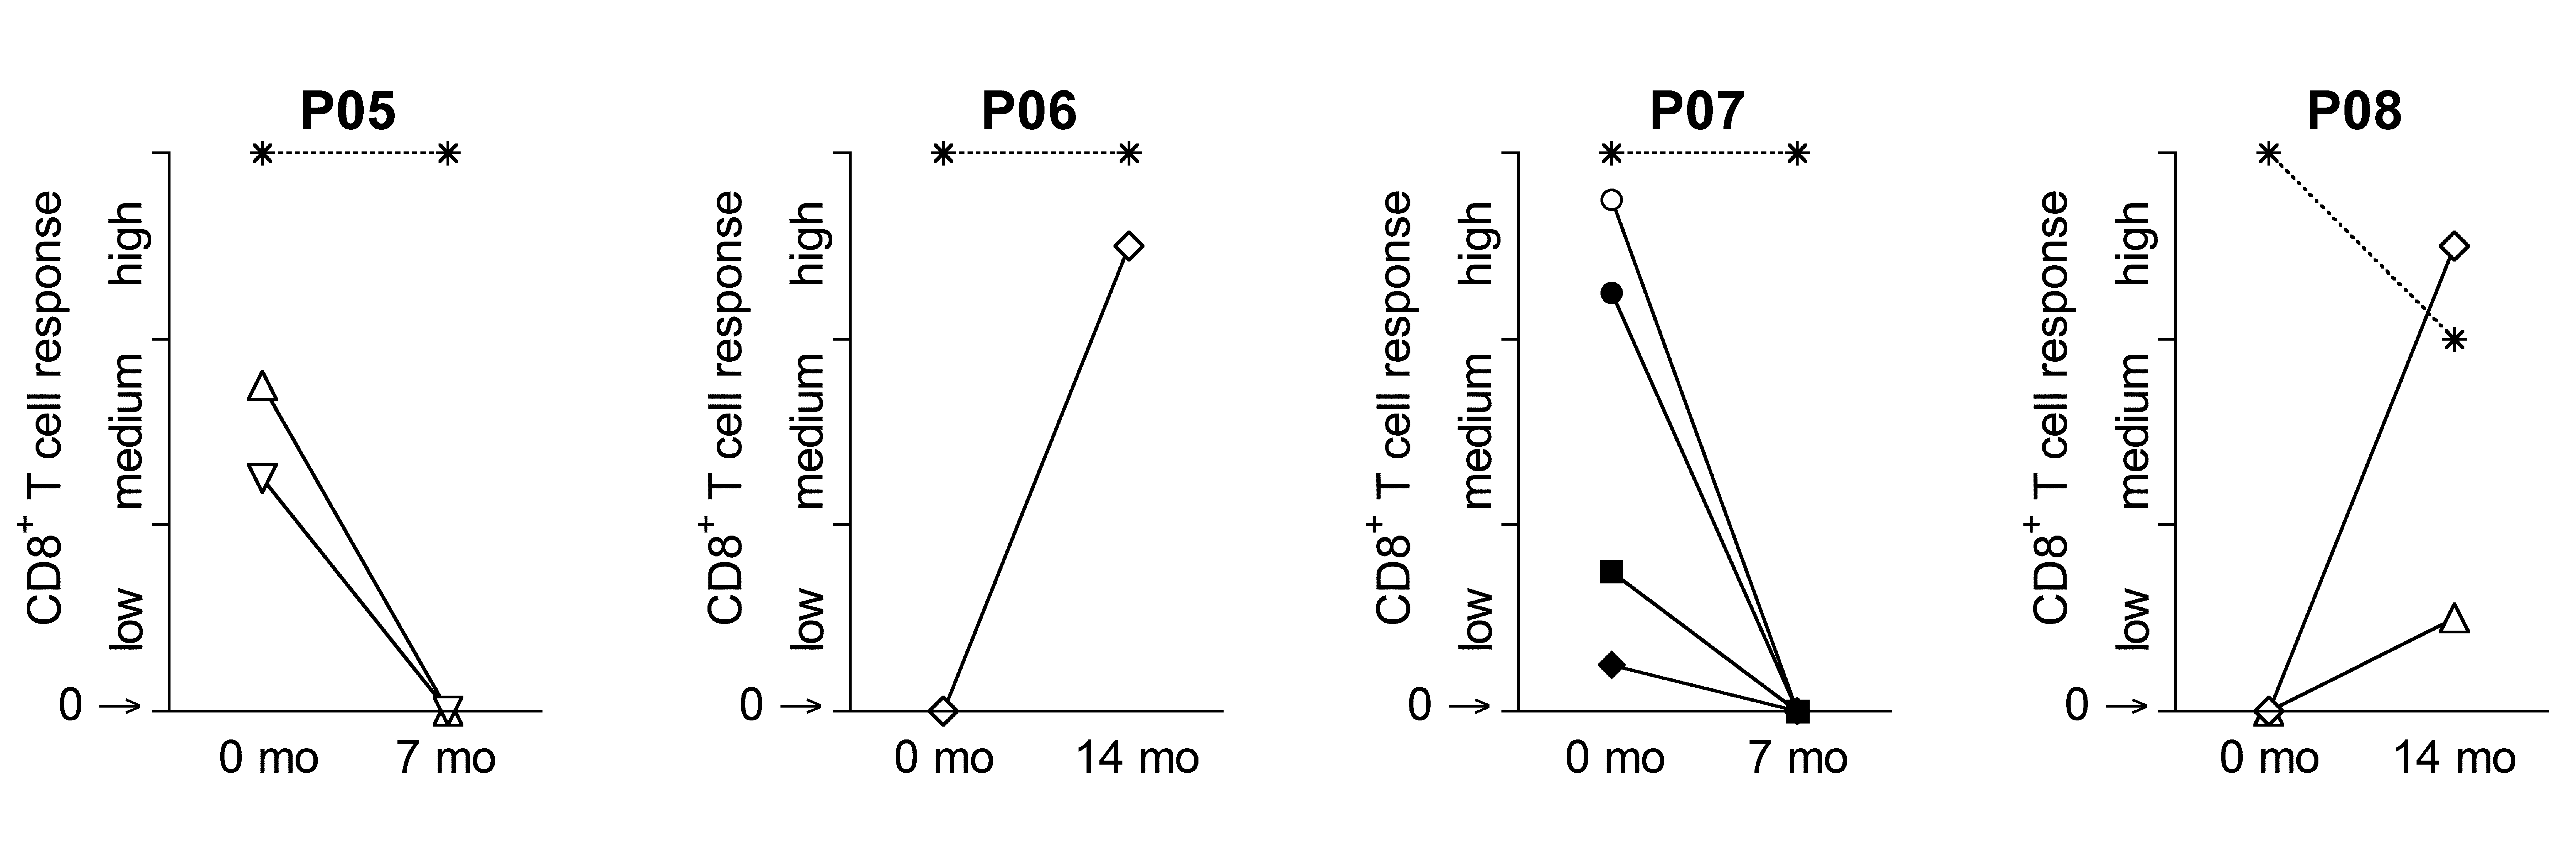
**

**FIGURE 3**

**PART 2**

**
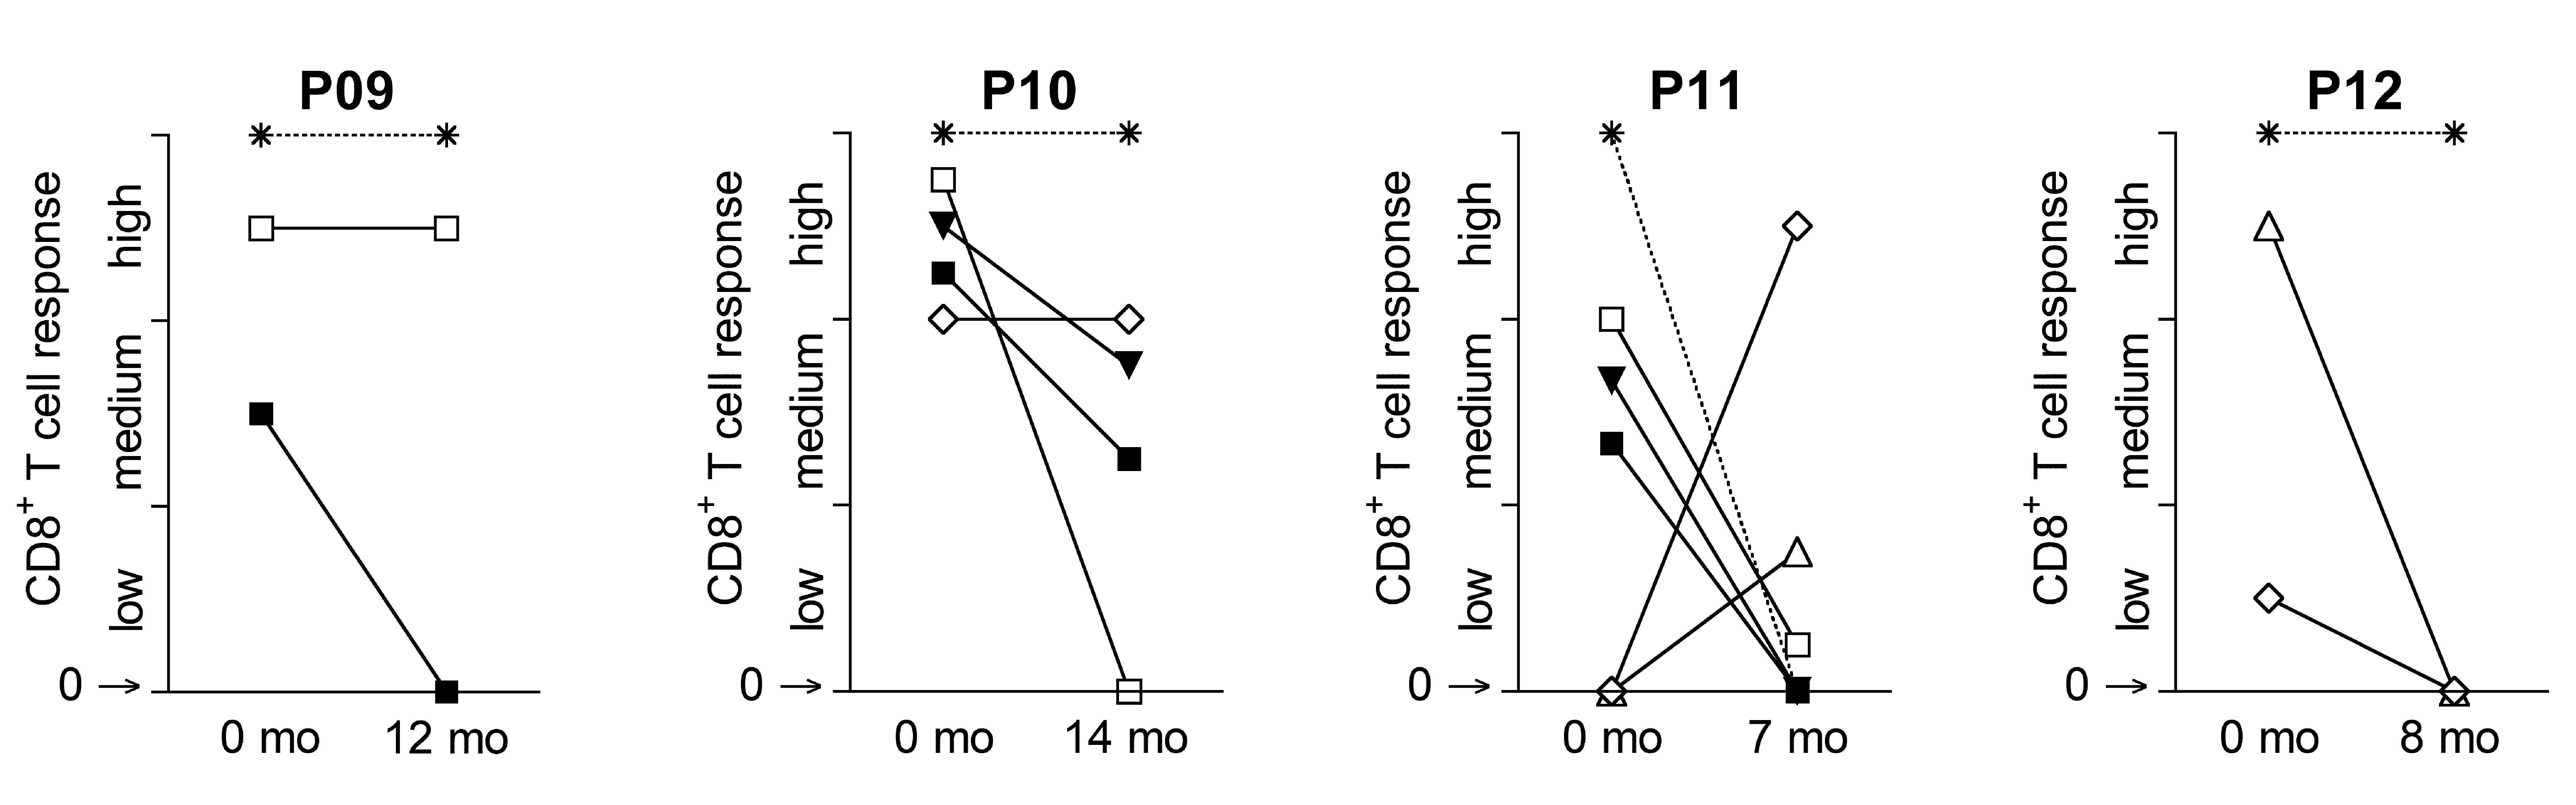
**

**FIGURE 3**

**PART 3**

**
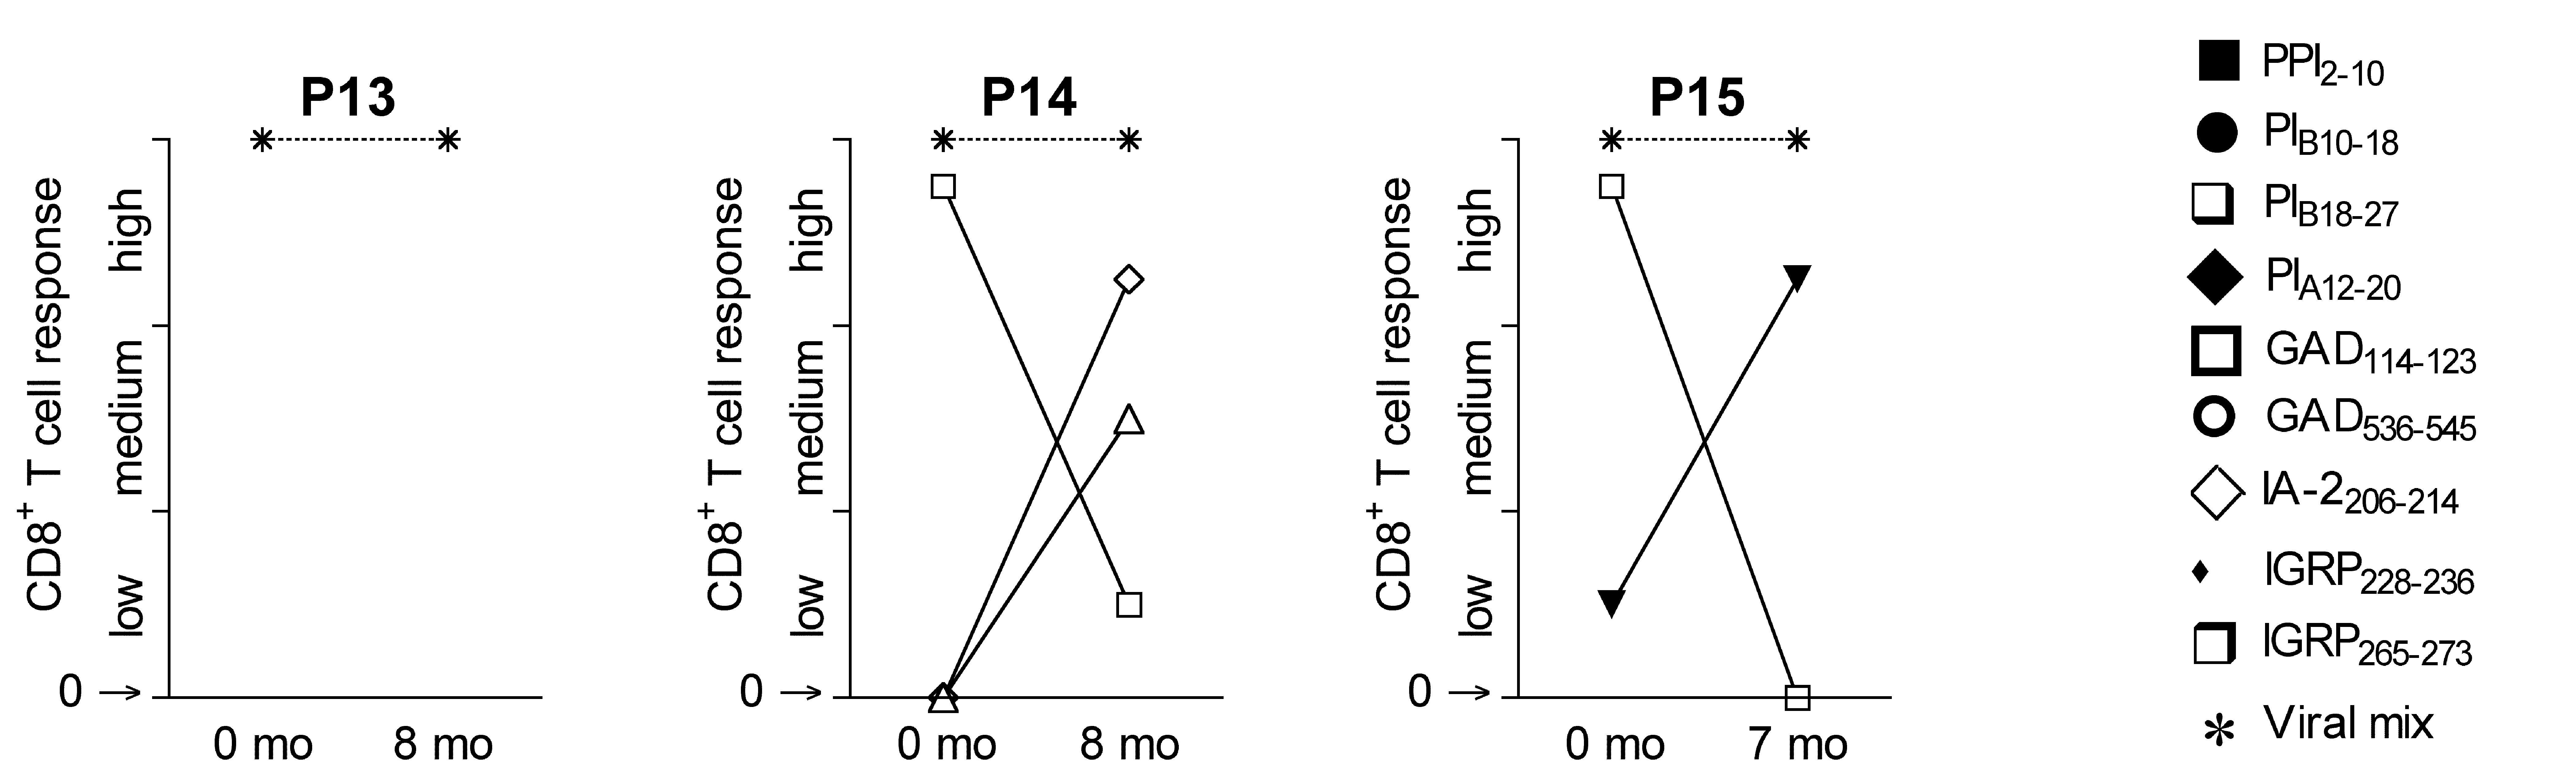
**

**FIGURE 3**

**PART 4**

**
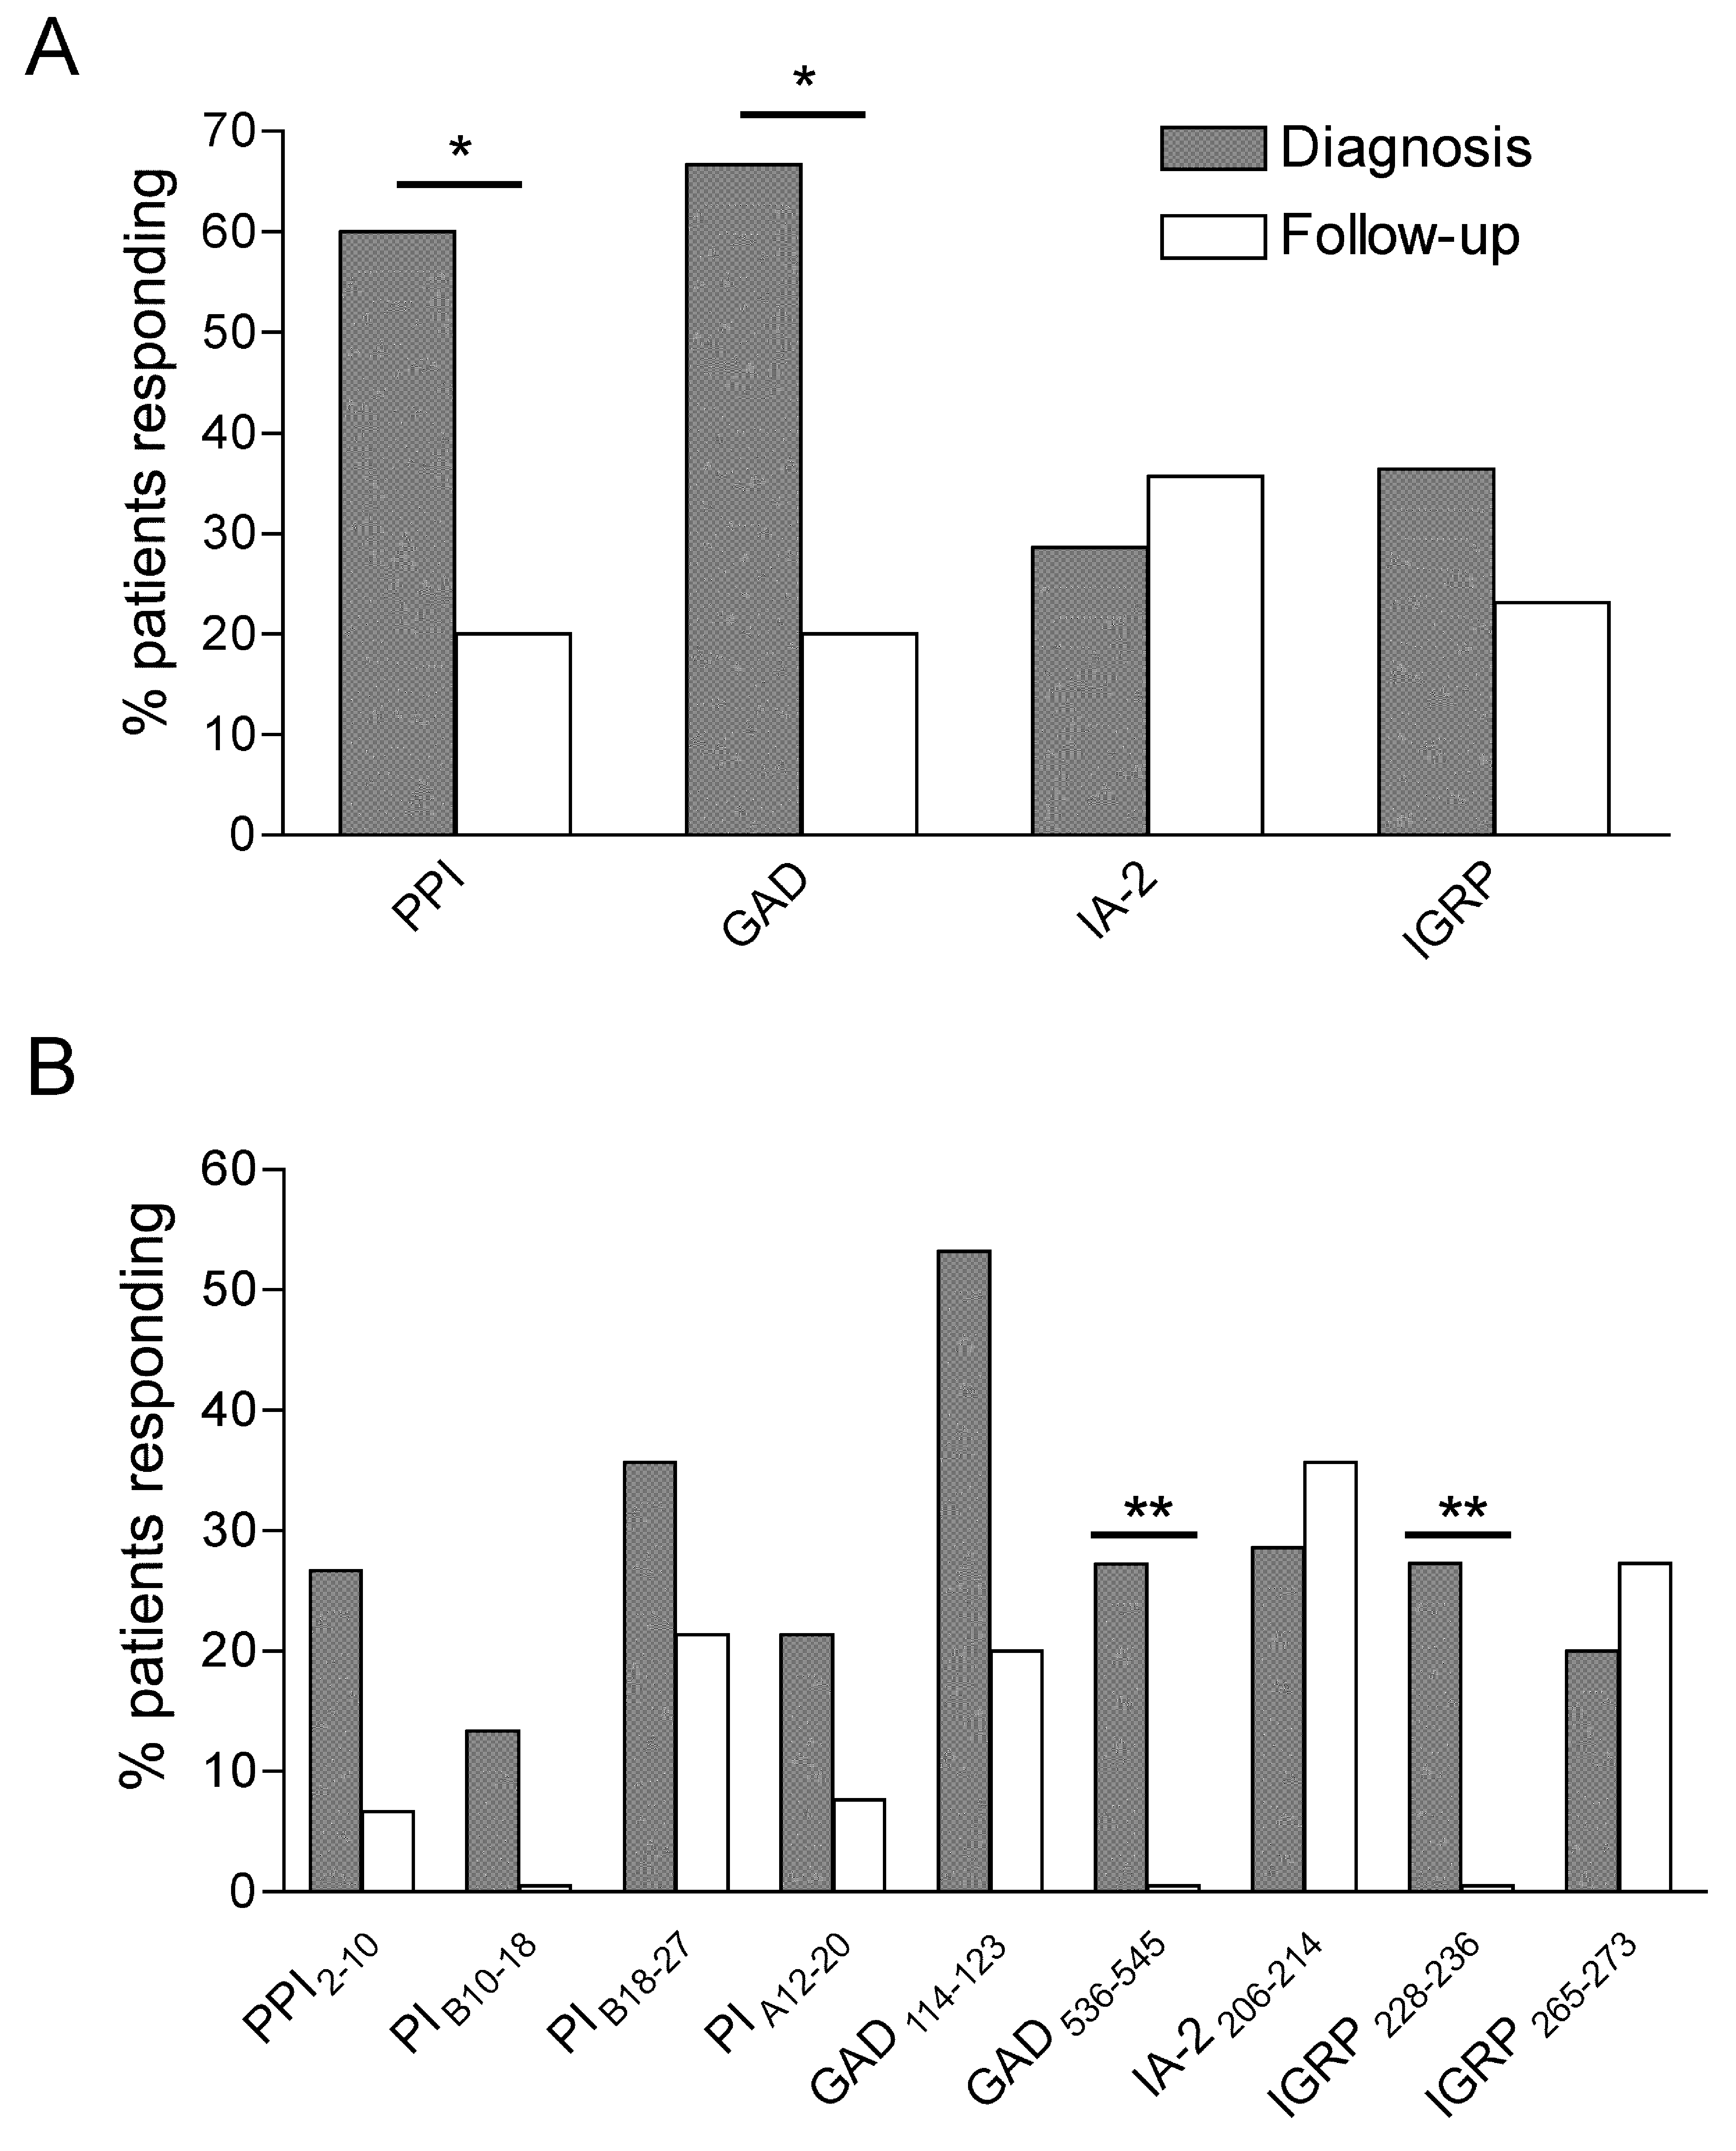
**

**FIGURE 4**

**
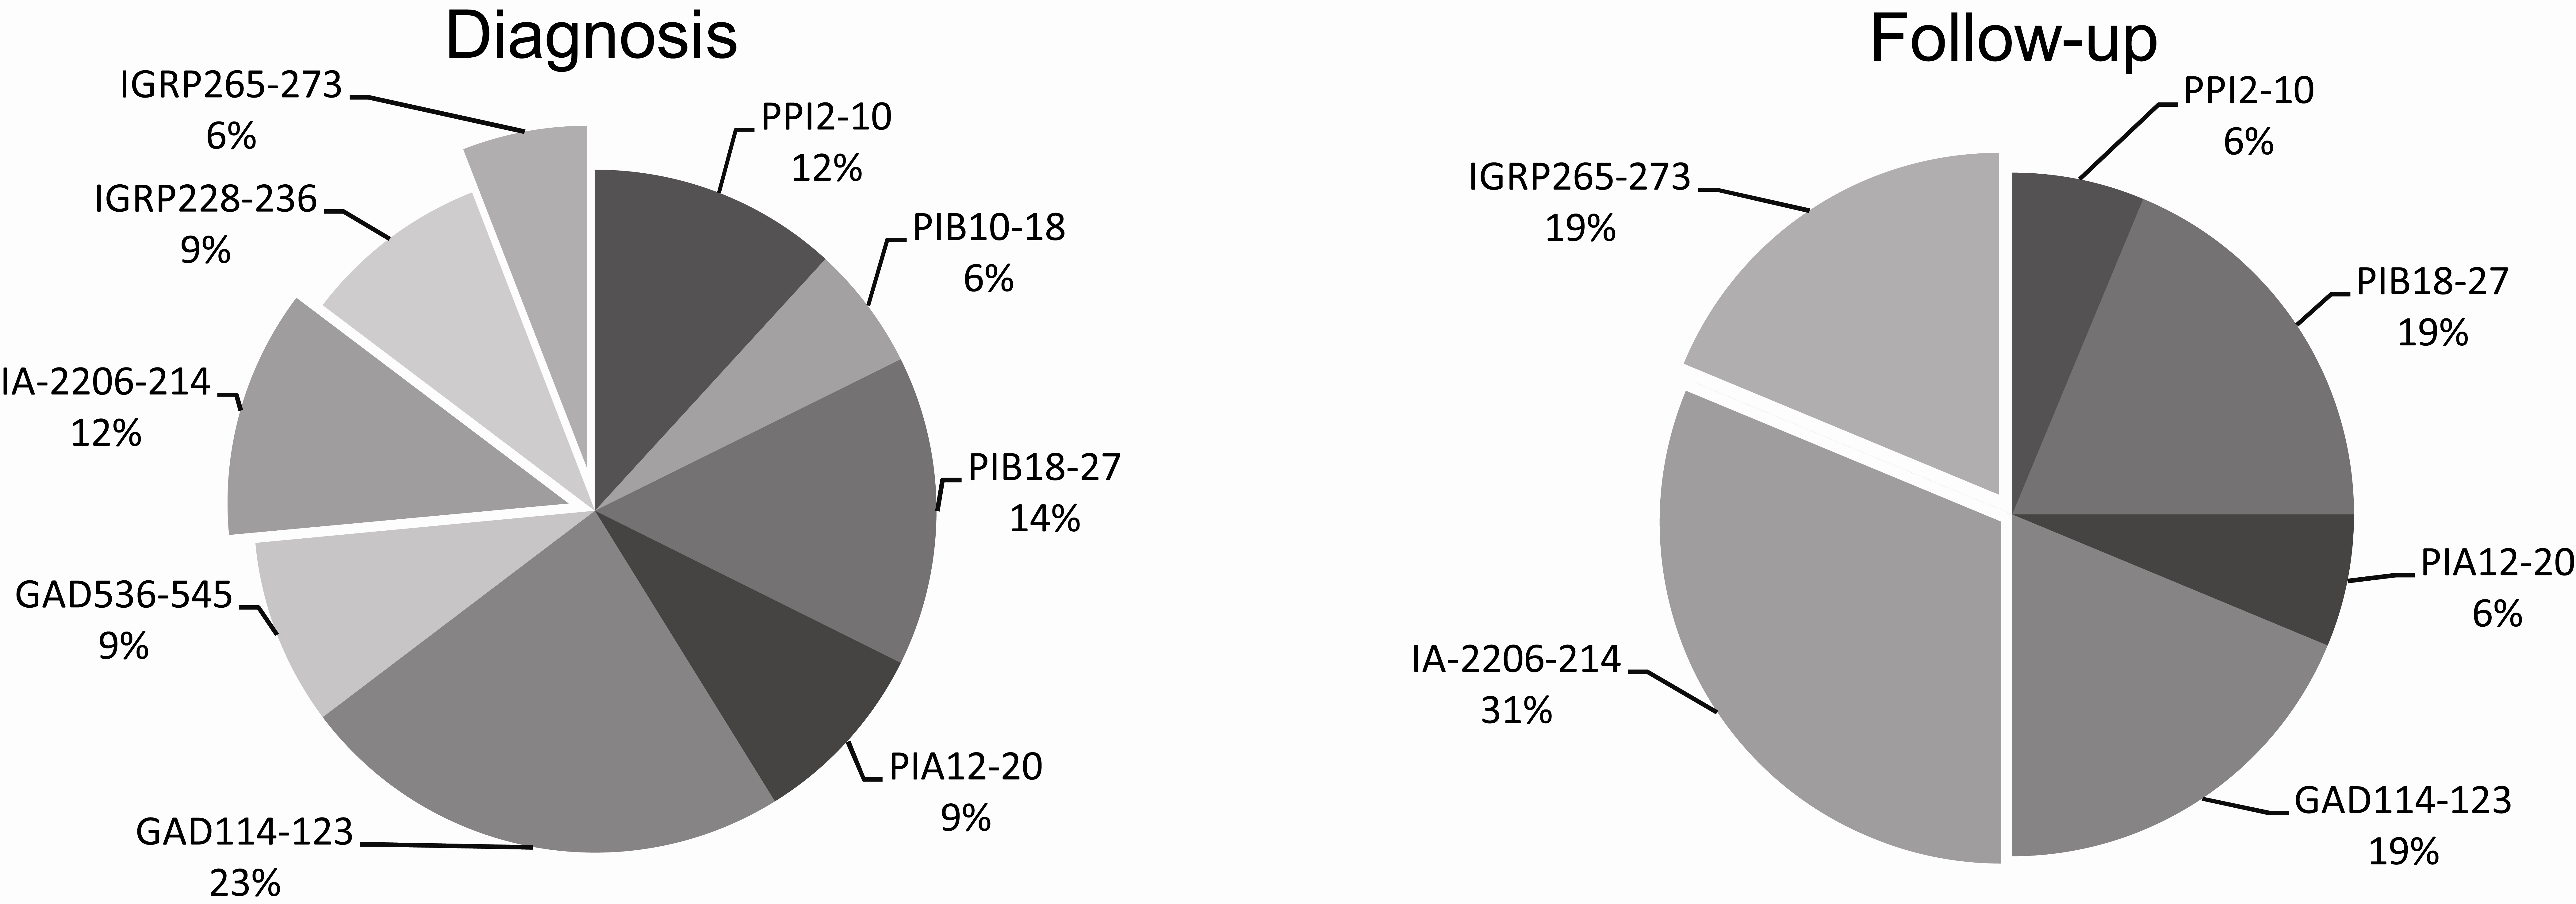
**

**FIGURE 5**

Supplement: db071594figures.doc [file db071594figures.doc]
